# Supplementary material
Source: PubMed Central journal article supplement (PMC5696107)
Supplement: NIHMS900927-supplement.pdf [file NIHMS900927-supplement.pdf]

## Supplementary Materials

**Supplementary Figure 1.** Individual-subject data on the effects of contextual WM load on AC activations during the Q–A periods. The waveforms reflect the modeled differences in filler-evoked activations during high vs. low WM load in each subject. At the group level, the reduction of negative AC activity was significant during the shaded period ( $p < 0.01$ , cluster-based randomization test; see **Fig. 2b, c**). The vertical axes ("fitted dSPM") reflect GLME-modeled values in arbitrary statistical units.

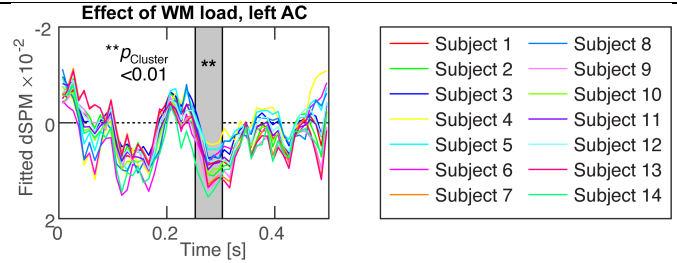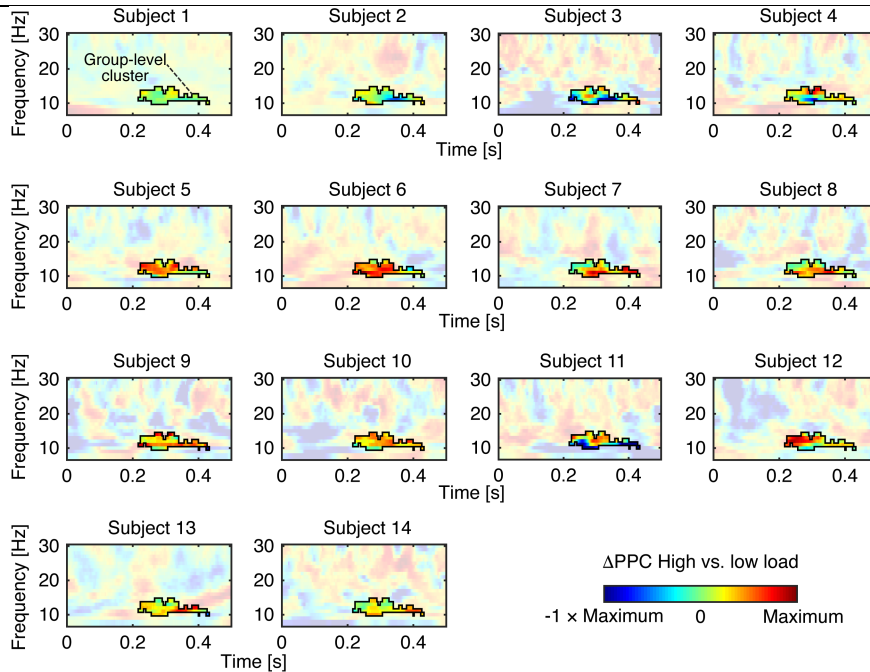

**Supplementary Figure 2.** Oscillatory PPC results individual subjects during the Q–A periods. The data show time-frequency representations of the differences in PPC ( $\Delta$ PPC) between the left DLPFC and left AC during trials with high vs. low contextual WM maintenance load. The time-frequency region showing significant alpha-range PPC at the group level has been encircled in each subject (cluster-based randomization test,  $p < 0.01$ ; see **Fig. 2d**). The representations have been scaled in each subject based on their individual maximum connectivity difference.

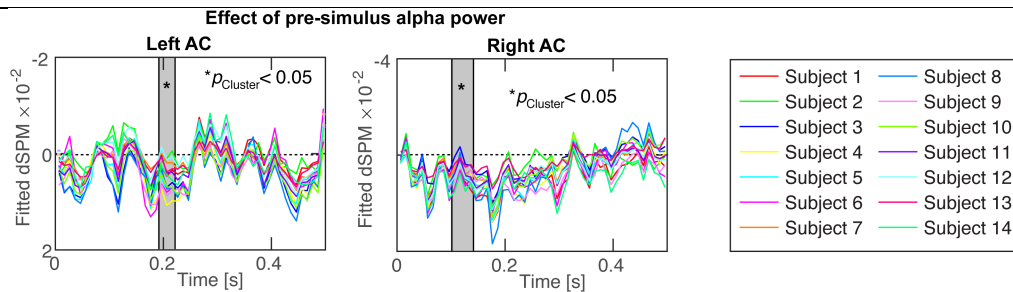

**Supplementary Figure 3.** Individual-subject data on the effect of pre-stimulus alpha power on AC activations during the Q–A periods. The waveforms depict the modeled differences in responses to filler sounds across trials within the highest vs. lowest quintiles of pre-stimulus alpha-power in each subject. At the group level, negative AC activity decreased significantly as a function of increasing pre-stimulus alpha power during the shaded periods ( $p < 0.05$ , cluster-based randomization test; see **Fig. 4**). The vertical axes ("fitted dSPM") reflect GLME-modeled values in arbitrary statistical units.
